# Supplementary material for: PIP2 depletion promotes TRPV4 channel activity in mouse brain capillary endothelial cells
Source: eLife. 2018 Aug 7;7:e38689. doi: 10.7554/eLife.38689 (PMC6117155; doi:10.7554/eLife.38689)
Supplement: Figure 1—source data 1. [file elife-38689-fig1-data1.xlsx]

## Sheet: Sheet1
Figure 1B
	C57	TRPV4 KO
	62.69	1.42
	118	1.33
	61.1	1.5
	372.1	1.07
	84.9	0.37
	154.6	-0.61
	105.8
	113.7
	31.84
	190.72
	127.6
	131.9
	188.5
	182.2
	209
	111.7
	78.5
	129.59
	194
	275.25
	341.07
	83.54
	130.15
	60.74
	185.6
MEAN	148.992	0.846667
SEM	16.8822	0.336062
