# Supplementary material for: PIP2 depletion promotes TRPV4 channel activity in mouse brain capillary endothelial cells
Source: eLife. 2018 Aug 7;7:e38689. doi: 10.7554/eLife.38689 (PMC6117155; doi:10.7554/eLife.38689)
Supplement: Figure 1—source data 2. [file elife-38689-fig1-data2.xlsx]

## Sheet: Sheet1
Figure 1C
	1 mM Mg-ATP		0 mM Mg-ATP
	Control	GSK101+RuR	Control	GSK101+RuR
	3.1	15.4	4.91	67.6
	2.75	25.7	12.1	130.1
	7.7	9.96	2.5	63.6
	2.3	29.2	10.3	382.4
	9.12	7.8	9.4	94.3
	4.6	4.4	6.2	24.7
	2.4	9.95	4.3	158.9
	6.5	3.6	2	107.8
	3.2	13.6	2.7	116.4
	11.36	16.2	4.76	36.6
	5.1	3.43	1.68	192.3
	3	6.2	1.58	130.8
	6.2	5.85	3.2	133.3
	3.15	5.3	1.4	189.8
	2.7	4.6	1.3	185.8
	1.4	2.7	3.6	613
	2.2	8.1	6	215.4
	4.05	3.6	10.1	113.1
	2.2	5.8	6.4	83.33
	2.7	8.5	1.4	134.17
	6.4	2.1	4.83	198
	1.5	3.8	4.58	154.62
	3.2	5.5	4	280
	2.7	2.8	4.75	179.75
	7.1	14.2	1.94	343.01
	2.01	5.5	2	175
	3.7	4.81	3	434.04
			2.66	942.86
			2.96	86.54
			7.2	335
			3.4	132.81
			5.1	63.7
			10.3	843.75
MEAN	4.16074	8.46667	4.62273	222.499
SEM	0.478667	1.30251	0.515816	37.1122
