# Supplementary material for: PIP2 depletion promotes TRPV4 channel activity in mouse brain capillary endothelial cells
Source: eLife. 2018 Aug 7;7:e38689. doi: 10.7554/eLife.38689 (PMC6117155; doi:10.7554/eLife.38689)
Supplement: Figure 1—source data 3. [file elife-38689-fig1-data3.xlsx]

## Sheet: Sheet1
Figure 1D
	1 mM Mg-ATP	0 mM Mg-ATP	0 mM Mg-ATP+HC-067047
	0.0586	0.0287	0.064855
	0.03	0.0352	0.017391
	0.038281	0.1247	0.170272
	0.067287	0.33839	0.049129
	0.046564	0.129969	0.014258
	0.03021	0.045457
	0.026792	0.192161
	0.044229	0.0913
	0.02143	0.212896
	0.01722	0.445625
	0.02791	0.199273
	0.009763	0.496578
	0.02148	0.374897
	0.0981
	0.002491
	0.071159
MEAN	0.0382198	0.208857	0.063181
SEM	0.00628977	0.043854	0.0284244
