# Supplementary material for: PIP2 depletion promotes TRPV4 channel activity in mouse brain capillary endothelial cells
Source: eLife. 2018 Aug 7;7:e38689. doi: 10.7554/eLife.38689 (PMC6117155; doi:10.7554/eLife.38689)
Supplement: Figure 2—source data 1. [file elife-38689-fig2-data1.xlsx]

## Sheet: Sheet1
Figure 2C
	0 mM ATP	1mM ATP	1mM ATP+H-89	1mM ATP+ KT5823	1mM ATP+ Cal C
	63	12	1.25	2	0.1
	120	23	3.5	2	57
	60	8	4.1	5	5
	372	20	1	2	20
	85	3	2	3.2	2
	20	2	2.3	22.9	-0.6
	155	3.5		10	0
	105	0.4			3.3
	115	2.2
	31	11
	6	0.4
	190	0
	127	2.5
	132	2.5
	188	3.2
	182	0.5
	600	4
	210	1.4
	112	3
	80	2
	130	0.5
	195	2.3
	150	0.1
	275	7
	175
	340
	170
	430
	940
	80
	330
	130
	60
	840
MEAN	211.706	4.77083	2.35833	6.72857	10.85
SEM	36.4737	1.24138	0.501401	2.90621	7.00444
