# Supplementary material for: PIP2 depletion promotes TRPV4 channel activity in mouse brain capillary endothelial cells
Source: eLife. 2018 Aug 7;7:e38689. doi: 10.7554/eLife.38689 (PMC6117155; doi:10.7554/eLife.38689)
Supplement: Figure 2—source data 3. [file elife-38689-fig2-data3.xlsx]

## Sheet: Sheet1
Figure 2D
	Mg-ATP concentration
	0 mM	0.01 mM	0.1 mM	1 mM
	62.6	80.88	65.5	4.96
	125.1	176.4	52.08	24.2
	58.6	325	277.6	2.8
	377.4	230.45	274	1
	89.3	132.71	141.55	4.95
	19.7	214	50.19	2
	153.9		64.73	8.6
	102.8		360.5	11.2
	111.4		187.4	3
	31.6		100.83	1.2
	2.14			0.85
	187.3			0.3
	125.8			1
	128.3			3
	184.8			3.1
	180.8			5
	608			0.8
	210.4			3.5
	108.1			3
	78.33			2
	129.17			0.5
	193			6
	149.62			9.2
	275			0.5
	174.75			3
	338.01			10.4
	170			20.7
	429.04
	937.86
	81.54
	330
	127.81
	58.7
	838.75
	190
	188
MEAN	209.934	193.24	157.438	5.06519
SEM	34.5077	34.5198	35.4752	1.13404
