# Supplementary material for: PIP2 depletion promotes TRPV4 channel activity in mouse brain capillary endothelial cells
Source: eLife. 2018 Aug 7;7:e38689. doi: 10.7554/eLife.38689 (PMC6117155; doi:10.7554/eLife.38689)
Supplement: Figure 3—source data 1. [file elife-38689-fig3-data1.xlsx]

## Sheet: Sheet1
Figure 3B
	Control	WRTMN 0.1 uM	WRTMN 50 uM	PIK93 0.3 uM	PAO 30 uM	LY294 10uM	LY294 300uM
	15.4	3.6	72.95	21.11	301.2	14.38	83.64
	25.7	5	34	55.56	35	6.67	43.57
	9.96	3.5	22.55	337.7	22.86	19.13	39.29
	29.2	4.2	244.19	29.43	174	11.11	122.36
	7.8		85.44	27.8	41.67	15.76	57.88
	4.4		114.67	45.8	29	4.94	69.41
	9.95			136.37			80.33
	3.6			67.45			48.13
	13.6						57.46
	16.2
	3.43
	6.2
	5.85
	5.3
	4.6
	2.7
	8.1
	3.6
	5.8
	8.5
	2.1
	3.8
	5.5
	2.8
	14.2
	5.5
	4.81
MEAN	8.46667	4.075	95.6333	90.1525	100.622	11.9983	66.8967
SEM	1.30251	0.344903	32.7566	37.6632	46.3947	2.23371	8.63785
