# Supplementary material for: PIP2 depletion promotes TRPV4 channel activity in mouse brain capillary endothelial cells
Source: eLife. 2018 Aug 7;7:e38689. doi: 10.7554/eLife.38689 (PMC6117155; doi:10.7554/eLife.38689)
Supplement: Figure 3—source data 2. [file elife-38689-fig3-data2.xlsx]

## Sheet: Sheet1
Figure 3D
	diC8-PIP2 concentration
	0 µM	10 µM	20 µM	50 µM
	67.6	19.75	17.78	13.9
	130.1	9.44	36.47	7.47
	63.6	121	63.63	125
	382.4	24.5	65.88	148.2
	94.3	29.17	118.24	103.45
	24.7	31.76	34.29	11.5
	158.9	41	42.08	50
	107.8	26.25	7.78	14.29
	116.4	62.27	4.55	22.12
	36.6	100	13.47	150
	843.75	15.5	48.18
	192.3	69.71
	130.8	106.67
	133.3	31.67
	189.8	31.43
	185.8	15.58
	613
	215.4
MEAN	204.808	45.9812	41.1227	64.593
SEM	49.655	8.82964	9.97474	19.0445
