# Supplementary material for: PIP2 depletion promotes TRPV4 channel activity in mouse brain capillary endothelial cells
Source: eLife. 2018 Aug 7;7:e38689. doi: 10.7554/eLife.38689 (PMC6117155; doi:10.7554/eLife.38689)
Supplement: Figure 3—source data 3. [file elife-38689-fig3-data3.xlsx]

## Sheet: Sheet1
Figure 3F
	No poly-l-lysine	with poly-L-lysine
	4.4	19.38
	9.95	188.57
	3.6	56.67
	3.43	38.68
	6.2	21.82
	5.85	20
	5.3	17.25
	4.6	15.22
	2.7
	8.1
	3.6
	5.8
	8.5
	2.1
	3.8
	5.5
	5.5
	4.81
MEAN	5.20778	47.1988
SEM	0.481891	20.799
