# Supplementary material for: PIP2 depletion promotes TRPV4 channel activity in mouse brain capillary endothelial cells
Source: eLife. 2018 Aug 7;7:e38689. doi: 10.7554/eLife.38689 (PMC6117155; doi:10.7554/eLife.38689)
Supplement: Figure 5—source data 1. [file elife-38689-fig5-data1.xlsx]

## Sheet: Sheet1
Figure 5B
	Control	PGE2
	12.3	16.5
	20.08	7.62
	3.2	27.29
	2	31
	3.45	36.89
	0.4	14.28
	2.24	33.77
	11.1	75
	0.43	5.6
	0	63.9
	2.7	55.76
	2.6	44
	3.2	17
	0.5	116.27
	4.05	50
	1.4
	3.1
	2.1
	0.6
	3.8
	2.3
	0
	0.1
	7.1
	3.49
	1.11
	7.66
MEAN	3.74111	39.6587
SEM	0.869589	7.635
