# Supplementary material for: PIP2 depletion promotes TRPV4 channel activity in mouse brain capillary endothelial cells
Source: eLife. 2018 Aug 7;7:e38689. doi: 10.7554/eLife.38689 (PMC6117155; doi:10.7554/eLife.38689)
Supplement: Figure 5—source data 2. [file elife-38689-fig5-data2.xlsx]

## Sheet: Sheet1
Figure 5C
	PGE2 (2 uM)
	Control	TRPV4 KO	HC-067047	diC8-PIP2	U73122	U73343	AH6809	SC51322	Calphostin C	Go6976	CPA	BAPTA
	1.5	3.13	5	20.662	2.5	10.68	3.32	2.93	140	47	86.11	8.17
	16.5	0.87	7.26	6.26	11.5	18.88	0.82	-0.22	72	35	6.3	65.21
	7.62	2.3	6.1	16.3	5	22.12	1.45	7.43	2	125	17	150
	27.29			1.09	21	106	48.83	-0.63	44	10.8	124	7.07
	32			0.86	20	35	0.2	1.38	30	7	74	4
	36.89				10.2	16	3.73		31	12.9	11.5	31.8
	14.28				30	54			4		2.1
	33.77				2.1				55		47.3
	265				7.1				43		27
	75				1.47				20
	5.6				7.5				160
	63.9
	55.76
	42
	17
	116.27
	50
MEAN	50.6106	2.1	6.12	9.0344	10.7609	37.5257	9.725	2.178	54.6364	39.6167	43.9233	44.375
SEM	15.1473	0.660025	0.652482	4.03498	2.77653	11.8458	7.84148	1.45638	15.5618	18.2338	14.1103	23.1527
