# Supplementary material for: PIP2 depletion promotes TRPV4 channel activity in mouse brain capillary endothelial cells
Source: eLife. 2018 Aug 7;7:e38689. doi: 10.7554/eLife.38689 (PMC6117155; doi:10.7554/eLife.38689)
Supplement: Figure 6—source data 1. [file elife-38689-fig6-data1.xlsx]

## Sheet: Sheet1
Figure 6B
		CONTTROL			+PGE2
	Voltage (mV)	MEAN	SEM	N	MEAN	SEM	N
	-140	-26.4	7.3	5	-10.3	3.1	5
	-130	-22.8	6.7	5	-9.1	2.69	5
	-120	-19.7	5.7	5	-8.01	2.44	5
	-110	-16.9	4.8	5	-6.85	2.345	5
	-100	-14.6	4.3	5	-5.58	1.869	5
	-90	-12.2	3.5	5	-4.89	1.49	5
	-80	-10.4	2.9	5	-4.15	1.37	5
	-70	-8.3	2.4	5	-3.35	1.101	5
	-60	-6.4	1.9	5	-2.7	0.928	5
	-50	-5.1	1.5	5	-2.099	0.749	5
	-40	-3.8	1.2	5	-1.445	0.568	5
	-30	-2.3	0.9	5	-0.7	0.435	5
	-20	-1.2	0.7	5	-0.378	0.357	5
	-10	-0.4	0.5	5	-0.011	0.24	5
	0	0.5	0.2	5	0.294	0.162	5
	10	1.4	0.06	5	0.873	0.118	5
	20	2	0.29	5	2.01	0.232	5
	30	2.9	0.4	5	4.03	0.787	5
	40	4.1	0.7	5	8.233	1.95	5
	50	5.8	2.1	5	13.893	3.4	5
	60	8.5	2	5	21.278	5.1	5
	70	12	3.4	5	29.521	7.18	5
	80	16.7	5.2	5	40.233	9.69	5
	90	20	5.9	5	50.61	12.3	5
	100	24.4	7.6	5	61.35	15.1	5
CONTROL
V (mV)	-140	-130	-120	-110	-100	-90	-80	-70	-60	-50	-40	-30	-20	-10	0	10	20	30	40	50	60	70	80	90	100
cEC1	-18.125	-16.375	-14.25	-12.25	-10.5	-9	-7.375	-6.125	-4.5	-3.75	-2.625	-1.625	-0.625	0	0.625	1.25	1.75	2.875	4.75	7.5	10.875	15.5	20.75	25.75	32.25
cEC2	-15.748	-12.9134	-11.4173	-9.52756	-8.66142	-7.24409	-6.37795	-4.96063	-3.85827	-2.51969	-1.5748	-0.629921	0.314961	0.866142	1.25984	1.5748	1.9685	2.20472	2.67717	3.07087	3.54331	3.85827	4.48819	4.64567	5.35433
cEC3	-10	-6.95122	-6.34146	-5.97561	-4.14634	-3.65854	-3.53659	-2.56098	-1.82927	-1.95122	-1.46341	-0.609756	-0.243902	0.121951	0.609756	1.34146	1.46341	1.95122	2.80488	3.90244	5.60976	7.43902	10	12.3171	15.122
cEC4	-42.8571	-37.3016	-31.9048	-27.3016	-23.1746	-19.3651	-16.1905	-12.6984	-10	-7.46032	-5.55556	-3.65079	-2.06349	-0.952381	0	1.26984	1.74603	2.85714	4.12698	5.55556	7.46032	9.84127	13.6508	17.619	19.8413
cEC5	-45.2857	-40.2857	-34.7143	-29.5714	-26.4286	-21.5714	-18.7143	-15.2857	-11.8571	-9.71429	-7.57143	-5.14286	-3.42857	-2.14286	0	1.42857	3.14286	4.42857	6.28571	9.14286	15	23.2857	34.8571	39.5714	49.4286
MEAN	-26.4032	-22.7654	-19.7256	-16.9252	-14.5822	-12.1678	-10.4389	-8.32615	-6.40894	-5.0791	-3.75804	-2.33167	-1.2092	-0.421429	0.49892	1.37294	2.01416	2.86333	4.12895	5.83434	8.49768	11.9849	16.7492	19.9806	24.3992
SEM	7.34305	6.73146	5.70586	4.81701	4.32893	3.51365	2.95874	2.41828	1.91966	1.50426	1.206	0.894516	0.680132	0.518456	0.235056	0.0594045	0.293346	0.431037	0.667015	1.12177	2.02353	3.40122	5.24113	5.98562	7.60807
PGE2
cEC1	-6.625	-6.375	-5.875	-4.25	-3.875	-2.875	-2.5	-2	-1.5	-1.25	-0.5	0	0.125	0.375	0.5	0.75	1.5	4.125	7.125	12.25	21	28.375	39	48.125	60
cEC2	-5.51181	-4.48819	-3.77953	-2.75591	-2.51969	-2.59843	-1.73228	-1.5748	-1.25984	-0.787402	-0.393701	-0.15748	0.15748	0.23622	0.472441	1.02362	1.49606	1.9685	2.59843	3.54331	4.96063	5.90551	7.55906	9.29134	10.7087
cEC3	-3.90244	-3.41463	-2.80488	-2.31707	-2.19512	-2.07317	-1.58537	-1.21951	-1.09756	-0.731707	-0.731707	0	0	0	0.243902	0.97561	2.07317	4.39024	10	14.878	21.0976	27.439	36.4634	45.9756	55.3659
cEC4	-18.8889	-16.3492	-14.9206	-13.6508	-11.1111	-9.36508	-7.93651	-6.66667	-5.71429	-4.44444	-3.1746	-2.22222	-1.74603	-0.952381	-0.31746	0.47619	2.69841	6.66667	14.4444	25.0794	37.619	50.3175	65.7143	83.4921	102.698
cEC5	-16.7143	-14.7143	-12.7143	-11.2857	-9.57143	-7.57143	-7	-5.28571	-4.14286	-3.28571	-2.42857	-1.14286	-0.428571	0.285714	0.571429	1.14286	2.28571	3	7	13.7143	21.7143	35.5714	52.4286	66.1429	78
MEAN	-10.3285	-9.06826	-8.01887	-6.8519	-5.85447	-4.89662	-4.15083	-3.34934	-2.74291	-2.09985	-1.44572	-0.704512	-0.378425	-0.0110892	0.294062	0.873656	2.01067	4.03008	8.23357	13.893	21.2783	29.5217	40.2331	50.6054	61.3546
SEM	3.10056	2.69336	2.44372	2.34516	1.8692	1.49101	1.37123	1.10136	0.928451	0.748999	0.568594	0.435173	0.35754	0.243359	0.162425	0.11803	0.23218	0.787448	1.95193	3.43477	5.1652	7.18484	9.69883	12.364	15.1478
