# Supplementary material for: PIP2 depletion promotes TRPV4 channel activity in mouse brain capillary endothelial cells
Source: eLife. 2018 Aug 7;7:e38689. doi: 10.7554/eLife.38689 (PMC6117155; doi:10.7554/eLife.38689)
Supplement: Figure 6—source data 2. [file elife-38689-fig6-data2.xlsx]

## Sheet: Sheet1
Figure 6C
Time (min)	TRPV4	Kir2.1
-3	0.45315	2.8
-2	-0.07294	7
-1	-0.89181	2
0	0	0
1	20.4631	7.4
2	27.2994	16.3
3	43.3792	33.3
4	60.9544	48
5	73.0346	60.6
6	67.411	66.5
7	71.691	68.1
8	72.5041	75.1
9	78.203	79.1
10	83.153	83.4
11	86.5874	90.4
12	84.4908	93.6
13	87.5874	98.5
14	96.0976	100
15	100	100
TRPV4
Time	-3	-2	-1	0	1	2	3	4	5	6	7	8	9	10	11	12	13	14	15
cEC1	0.456621	-5.02283	4.10959	0	17.8082	26.9406	37.4429	42.4658	31.5068	54.3379	68.0365	81.7352	94.0639	93.6073	90.411	90.8676	98.6301	100	100
cEC2	5.45455	-3.63636	0	0	29.0909	18.1818	36.3636	69.0909	123.636	69.0909	96.3636	87.2727	100	100	100	100	100	100	100
cEC3	-3.7037	0	-7.40741	0	3.7037	11.1111	35.1852	85.1852	103.704	107.407	101.852	100	100	100	100	100	100	100	100
cEC4	-0.551471	0.367647	-0.551471	0	1.10294	4.04412	7.90441	8.63971	9.375	12.3162	14.1544	32.5368	50	67.2794	80.3309	87.6838	95.4044	100	100
cEC5	0.609756	7.92683	-0.609756	0	50.6098	76.2195	100	99.3902	96.9512	93.9024	78.0488	60.9756	46.9512	54.878	62.1951	43.9024	43.9024	80.4878	100
MEAN	0.45315	-0.0729437	-0.891809	0	20.4631	27.2994	43.3792	60.9544	73.0346	67.411	71.691	72.5041	78.203	83.153	86.5874	84.4908	87.5874	96.0976	100
SEM	1.47186	2.25161	1.8501	0	9.07194	12.8049	15.1921	16.1389	22.1926	16.5992	15.6247	11.8103	12.194	9.29618	7.10121	10.4387	10.9535	3.90244	0
Kir2.1
Time	-3	-2	-1	0	1	2	3	4	5	6	7	8	9	10	11	12	13	14	15
cEC1	4.87805	8.53659	4.87805	0	-8.53659	-21.9512	-32.9268	-52.439	-73.1707	-73.1707	-76.8293	-81.7073	-87.8049	-93.9024	-92.6829	-95.122	-102.439	-100	-100
cEC2	8.33333	8.33333	0	0	-8.33333	-8.33333	-33.3333	-91.6667	-98.3333	-105.833	-89.1667	-103.333	-100	-100	-100	-100	-100	-100	-100
cEC3	-5.88235	5.88235	0	0	-17.6471	-8.82353	-55.8824	-50	-73.5294	-79.4118	-91.1765	-100	-100	-100	-100	-100	-85	-100	-100
cEC4	-2.94118	2.94118	0.735294	0	-6.61765	-7.35294	-10.2941	-15.4412	-20.5882	-28.6765	-37.5	-47.0588	-57.3529	-57.3529	-71.3235	-80.8824	-94.8529	-100	-100
cEC5	9.39597	9.39597	6.71141	0	4.02685	-34.8993	-34.2282	-30.2013	-37.5839	-45.6376	-45.6376	-43.6242	-50.3356	-65.7718	-87.9195	-91.9463	-110.067	-100	-100
MEAN	2.75677	7.01788	2.46495	0	-7.42156	-16.2721	-33.333	-47.9496	-60.6411	-66.546	-68.062	-75.1447	-79.0987	-83.4054	-90.3852	-93.5901	-98.4718	-100	-100
SEM	3.05596	1.17476	1.39641	0	3.45216	5.37254	7.2119	12.8595	13.9278	13.4614	11.1657	12.7236	10.6059	9.08467	5.28959	3.52639	4.166	0	0
